# Supplementary material for: Proteome Analysis for Understanding Abiotic Stress (Salinity and Drought) Tolerance in Date Palm (Phoenix dactylifera L.)
Source: Int J Genomics. 2015 Jun 18;2015:407165. doi: 10.1155/2015/407165 (PMC4488584; doi:10.1155/2015/407165)
Supplement: Supplementary file 1 — Supplementary materials shown in Table (1) is DIGE and MS analysis, Table (2) shows average ra-tio of robustly identified proteins, Table (3) shows robustly identified proteins (in salt stress, drought stress and salt and drought stress), Table (4) shows t-test for robustly identified proteins and Table (5) Average ratio of robustly identified proteins in drought and salt stressed plants. [file 407165.f1.zip]

Archive with 6 entries (5 files):
- 407165.f1/
- 407165.f1/Table 1 DIGE and MS results supplementary materials.xls
- 407165.f1/Table 2 supplementary materials  Robustly identified proteins.xls
- 407165.f1/Table 3 supplementary materials DSvSS robustly identified proteins.xls
- 407165.f1/Table 4 Supplementary materials summary table ss.xls
- 407165.f1/Table 5 supplementary materials summary table ds.xls
