# Supplementary material for: Proteome Analysis for Understanding Abiotic Stress (Salinity and Drought) Tolerance in Date Palm (Phoenix dactylifera L.)
Source: Int J Genomics. 2015 Jun 18;2015:407165. doi: 10.1155/2015/407165 (PMC4488584; doi:10.1155/2015/407165)
Supplement: Supplementary file 1 — Supplementary materials shown in Table (1) is DIGE and MS analysis, Table (2) shows average ra-tio of robustly identified proteins, Table (3) shows robustly identified proteins (in salt stress, drought stress and salt and drought stress), Table (4) shows t-test for robustly identified proteins and Table (5) Average ratio of robustly identified proteins in drought and salt stressed plants. [file 407165.f1.zip › 407165.f1/Table 1 DIGE and MS results supplementary materials.xls]

## Sheet: Sheet1
DIGE analysis											MS analysis
	T-test and Av.Ratio: SS / C			T-test and Av.Ratio: DS / C			T-test and Av.Ratio: SS / DS					NCBInr search					SwissProt search
Master No.	T-test	Av. Ratio	1-ANOVA	T-test	Av. Ratio	1-ANOVA	T-test	Av. Ratio	1-ANOVA	P2 - Spot Vol.	MS file	NCBInr number	protein name (green plant search)	Mr	protein Score	number of peptides	SwissProt Number	Protein name (all entries search)	Mr	protein Score	number of peptides	keratin (K first)
1272	0.07	-3.48	0.1	0.72	-1.35	0.1	0.052	-2.58	0.1	22179	S140123_013	gi|469474163	transketolase [Camellia sinensis]	81266	375	4	TKTC_MAIZE	Transketolase, chloroplastic OS=Zea mays PE=1 SV=1	72.9	186	1	K
1278	0.1	-5.15	0.17	0.68	-1.63	0.17	0.1	-3.16	0.17	109661	S140123_014	gi|469474163	transketolase [Camellia sinensis]	81266	268	2	TKTC_SPIOL	Transketolase, chloroplastic OS=Spinacia oleracea PE=1 SV=1	80.2	231	4	K
1780	0.015	2.1	0.16	0.26	1.94	0.16	0.6	1.09	0.16	13997	S140121_006	gi|292559515	ATP synthase CF1 beta chain [Phoenix dactylifera]	53847	292	5	ATPB_ACRAL	ATP synthase subunit beta, chloroplastic OS=Acrocomia aculeata GN=atpB PE=3 SV=1	53.8	554	14	K
1788	0.0023	3.3	0.089	0.51	2.03	0.089	0.23	1.63	0.089	118386	S140121_007	gi|292559515	ATP synthase CF1 beta chain [Phoenix dactylifera]	53847	1339	18	ATPB_CHASI	ATP synthase subunit beta, chloroplastic OS=Chamaedorea seifrizii GN=atpB PE=3 SV=1	53.7	1574	26	k
1839	0.054	-5.69	0.09	0.82	-1.22	0.09	0.06	-4.66	0.09	116708	S140121_008	gi|28195663	ribulose-1,5-bisphosphate carboxylase/oxygenase large subunit [Phoenix dactylifera]	49566	244	3	RBL_ASPEL	Ribulose bisphosphate carboxylase large chain (Fragment) OS=Aspidistra elatior GN=rbcL PE=3 SV=1	49.8	442	10	K
1919	0.095	-5.36	0.11	0.97	-1.13	0.11	0.038	-4.73	0.11	222970	S140121_009	gi|28195663	ribulose-1,5-bisphosphate carboxylase/oxygenase large subunit [Phoenix dactylifera]	49566	396	6	RBL_PHORE	Ribulose bisphosphate carboxylase large chain (Fragment) OS=Phoenix reclinata GN=rbcL PE=3 SV=1	51.7	880	18	K
1935	0.1	-7.32	0.12	0.87	-1.53	0.12	0.032	-4.79	0.12	41027	S140121_010	gi|131974	ribulose-1,5-bisphosphate carboxylase/oxygenase large subunit [Harpagophytum grandidieri]	52139	153	2	RBL_CERDE	Ribulose bisphosphate carboxylase large chain OS=Ceratophyllum demersum	53.6	59	2	K
2021	0.03	3.32	0.053	0.14	2.02	0.053	0.28	1.64	0.053	33871	S140121_011	gi|158325128	ATP synthase alpha subunit [Phoenix dactylifera]	18618	99	1	ATPA_LEMMI	ATP synthase subunit alpha, chloroplastic OS=Lemna minor	55	54	1	K
2153	0.05	3.43	0.074	0.12	2.3	0.074	0.36	1.49	0.074	13363	S140121_012_3844		no relevant protein hit					no relevant protein hit				K
2439	0.00095	-4.39	0.016	0.19	-1.62	0.016	0.14	-2.71	0.016	55585	S140121_013	gi|255544584	phosphoglycerate kinase, putative [Ricinus communis]	50114	431	5	PGKH_TOBAC	Phosphoglycerate kinase, chloroplastic OS=Nicotiana tabacum PE=2 SV=1	50.1	519	7	K
2439	0.00095	-4.39	0.016	0.19	-1.62	0.016	0.14	-2.71	0.016	55585	S140121_013	gi|225466690	sedoheptulose-1,7-bisphosphatase, chloroplastic [Vitis vinifera]	42898	118	2	S17P_SPIOL	Sedoheptulose-1,7-bisphosphatase, chloroplastic OS=Spinacia oleracea PE=2 SV=1	42.1	119	2	K
2528	0.0031	-4.67	0.0057	0.54	-1.27	0.0057	0.016	-3.68	0.0057	63894	S140121_014	gi|195645472	phosphoribulokinase [Zea mays]	46078	176	2	KPPR_MESCR	Phosphoribulokinase, chloroplastic OS=Mesembryanthemum crystallinum PE=2 SV=1	44.1	149	3	K
2594	0.012	-3.99	0.13	0.49	1.33	0.13	0.28	-5.31	0.13	87717	S140121_015	gi|514810582	ribulose bisphosphate carboxylase/oxygenase activase, chloroplastic-like [Setaria italica]	52132	235	3	RCAB_HORVU	Ribulose bisphosphate carboxylase/oxygenase activase B, chloroplastic OS=Hordeum vulgare GN=RCAB PE=2 SV=1	47.2	227	5	K
2695	0.0065	-4.13	0.0021	0.75	-1.19	0.0021	0.0019	-3.45	0.0021	177148	S140121_016	gi|205830697	RecName: Full=Unknown protein 18 - could be keratin	1393	75	1	Y3997_ARATH	Putative BTB/POZ domain-containing protein At3g49970 OS=Arabidopsis thaliana GN=At3g49970 PE=3 SV=1	59.8	56	1	K
2695	0.0065	-4.13	0.0021	0.75	-1.19	0.0021	0.0019	-3.45	0.0021	177148	S140121_016	gi|306755789	Putative heat shock protein 2	973	52	1		x
2796	0.022	-2.5	0.0065	0.0047	-4.12	0.0065	0.2	1.65	0.0065	23529	S140121_017	gi|28195663	ribulose-1,5-bisphosphate carboxylase/oxygenase large subunit [Phoenix dactylifera]	49566	369	2	RBL_PHORE	Ribulose bisphosphate carboxylase large chain (Fragment) OS=Phoenix reclinata GN=rbcL PE=3 SV=1	51.7	395	10	K
2796	0.022	-2.5	0.0065	0.0047	-4.12	0.0065	0.2	1.65	0.0065	23529	S140121_017	gi|306755789	Putative heat shock protein 2	973	51	1		x
2806	0.016	-6.57	0.099	0.42	-1.72	0.099	0.21	-3.81	0.099	192019	S140121_018	gi|28195663	ribulose-1,5-bisphosphate carboxylase/oxygenase large subunit [Phoenix dactylifera]	49566	214	2	RBL_LIRMU	Ribulose bisphosphate carboxylase large chain (Fragment) OS=Liriope muscari GN=rbcL PE=3 SV=1	49.6	423	10	K
2831	0.016	-6.48	0.046	0.34	-1.92	0.046	0.1	-3.37	0.046	265831	S140121_019	gi|28195663	ribulose-1,5-bisphosphate carboxylase/oxygenase large subunit [Phoenix dactylifera]	49566	618	4	RBL_ANACO	Ribulose bisphosphate carboxylase large chain OS=Ananas comosus GN=rbcL PE=3 SV=1	53.2	574	13	K
2836	0.012	-9.99	0.035	0.46	-1.74	0.035	0.054	-5.75	0.035	318807	S140121_020	gi|28195663	ribulose-1,5-bisphosphate carboxylase/oxygenase large subunit [Phoenix dactylifera]	49566	628	6	RBL_ASPEL	Ribulose bisphosphate carboxylase large chain (Fragment) OS=Aspidistra elatior GN=rbcL PE=3 SV=1	49.8	647	12	K
2882	0.0049	-4.27	0.064	0.38	-1.39	0.064	0.2	-3.07	0.064	92505	S140121_021	gi|292559516	ribulose-1,5-bisphosphate carboxylase/oxygenase large subunit [Phoenix dactylifera]	54271	509	3	RBL_ASPEL	Ribulose bisphosphate carboxylase large chain (Fragment) OS=Aspidistra elatior GN=rbcL PE=3 SV=1	49.8	547	13	K
2919	0.025	-2.96	0.022	0.084	-2.03	0.022	0.14	-1.46	0.022	18800	S140121_022	gi|205830697	Unknown protein 18	1393	125	2	PMS1_DICDI	Mismatch repair endonuclease pms1 OS=Dictyostelium discoideum	115220	51	1	K
2919	0.025	-2.96	0.022	0.084	-2.03	0.022	0.14	-1.46	0.022	18800	S140121_022	gi|119952178	oxygen evolving enhancer protein 1 precursor [Bruguiera gymnorhiza]	18204	50	1		x
2935	0.014	-3.17	0.04	0.26	-1.57	0.04	0.14	-2.02	0.04	58612	S140123_015	gi|28195663	ribulose-1,5-bisphosphate carboxylase/oxygenase large subunit [Phoenix dactylifera]	49566	199	2	RBL_ASPEL	Ribulose bisphosphate carboxylase large chain (Fragment) OS=Aspidistra elatior GN=rbcL PE=3 SV=1	49.8	389	10	K
2967	0.0017	-4.21	0.036	0.21	-1.63	0.036	0.23	-2.58	0.036	223700	S140123_016	gi|3152721	ribulose-1,5-bisphosphate carboxylase/oxygenase large subunit [Zantedeschia aethiopica]	53604	322	3	RBL_ASPEL	Ribulose bisphosphate carboxylase large chain (Fragment) OS=Aspidistra elatior GN=rbcL PE=3 SV=1	49.8	457	11	K
2967	0.0017	-4.21	0.036	0.21	-1.63	0.036	0.23	-2.58	0.036	223700	S140123_016	gi|407475	T-protein of the glycine decarboxylase complex [Pisum sativum]	44661	72	1	GCST_FLAAN	Aminomethyltransferase, mitochondrial OS=Flaveria anomala GN=GDCST PE=3 SV=1	44.3	70	1	K
3008	0.012	-3.7	0.03	0.093	-2.57	0.03	0.5	-1.44	0.03	71623	S140123_017	gi|209417491	ribulose-biphosphate carboxylase [Cyrtosperma macrotum]	51852	229	2	RBL_ANACO	Ribulose bisphosphate carboxylase large chain OS=Ananas comosus GN=rbcL PE=3 SV=1	53.2	371	9	K
3008	0.012	-3.7	0.03	0.093	-2.57	0.03	0.5	-1.44	0.03	71623	S140123_017	gi|306755789	Putative heat shock protein 2	973	48	1		x
3012	0.0006	-5.67	0.031	0.34	-1.42	0.031	0.14	-3.98	0.031	43458	S140123_018	gi|294461233	unknown [Picea sitchensis]	28036	55	1		no relevant protein hit				K
3015	0.0042	-7.6	0.023	0.3	-1.79	0.023	0.09	-4.25	0.023	543577	S140123_019	gi|209417489	ribulose-biphosphate carboxylase [Lasia spinosa]	51811	463	5	RBL_BARSC	Ribulose bisphosphate carboxylase large chain (Fragment) OS=Barnardia scilloides GN=rbcL PE=3 SV=1	50.4	675	13	k
3018	0.0099	-12.1	0.053	0.51	-1.49	0.053	0.1	-8.1	0.053	259655	S140123_020	gi|552592	ribulose 1,5-bisphosphate carboxylase [Hedychium flavum]	50037	94	1		no relevant protein hit				K
3019	0.0036	-6.38	0.028	0.3	-1.78	0.028	0.11	-3.58	0.028	179485	S140123_021	gi|209417489	ribulose-biphosphate carboxylase [Lasia spinosa]	51811	390	5	RBL_ANACO	Ribulose bisphosphate carboxylase large chain OS=Ananas comosus GN=rbcL PE=3 SV=1	53.2	579	13	k
3061	0.018	-2.6	0.028	0.1	-1.82	0.028	0.23	-1.43	0.028	878856	S140123_022	gi|102139745	chlorophyll A-B binding protein (CAB), putative [Musa acuminata]	28055	152	2	CB22_CUCSA	Chlorophyll a-b binding protein of LHCII type 1 (Fragment) OS=Cucumis sativus	22.1	65	2	K
3324	0.0019	-4.57	0.0063	0.16	-1.6	0.0063	0.061	-2.86	0.0063	92565	S140123_023	gi|146403796	chloroplast light-harvesting chlorophyll a/b-binding protein [Artemisia annua]	28542	90	2	CB21_SILPR	Chlorophyll a-b binding protein, chloroplastic (Fragment) OS=Silene pratensis PE=2 SV=2	22	95	2	K
3324	0.0019	-4.57	0.0063	0.16	-1.6	0.0063	0.061	-2.86	0.0063	92565	S140123_023	gi|21027	ferritin [Phaseolus vulgaris]	28404	78	1	FRI4_SOYBN	Ferritin-4, chloroplastic OS=Glycine max PE=1 SV=2	27.5	79	1	K
3373	0.042	-3.17	0.069	0.2	-1.48	0.069	0.24	-2.13	0.069	14056	S140123_024	gi|205830697	Unknown protein 18	1393	70	1		no relevant protein hit				K
3510	0.0044	2.68	0.065	0.37	1.83	0.065	0.21	1.47	0.065	16582	S140123_025	gi|205830697	Unknown protein 18	1393	88	1		no relevant protein hit				K
3765	0.0023	-2.71	0.0021	0.038	-1.73	0.0021	0.044	-1.56	0.0021	465081	S140123_026	gi|224109746	light-harvesting complex I protein Lhca1 [Populus trichocarpa]	26532	136	2	CAB6_ARATH	Chlorophyll a-b binding protein 6, chloroplastic OS=Arabidopsis thaliana GN=LHCA1 PE=1 SV=1	26	126	2	K
3809	0.0037	-3.69	0.011	0.24	-1.57	0.011	0.057	-2.34	0.011	55835	S140123_027	gi|205830697	Unknown protein 18	1393	74	1		no relevant protein hit				K
3809	0.0037	-3.69	0.011	0.24	-1.57	0.011	0.057	-2.34	0.011	55835	S140123_027	gi|84468376	putative PSII-P protein [Trifolium pratense]	28408	58	1		x
3820	1.5e-05	-8.52	0.008	0.098	-2.3	0.008	0.18	-3.71	0.008	74343	S140123_028	gi|28195663	ribulose-1,5-bisphosphate carboxylase/oxygenase large subunit [Phoenix dactylifera]	49566	180	1	RBL_CALUS	Ribulose bisphosphate carboxylase large chain (Fragment) OS=Calamus usitatus	52.2	57	1	K
3883	0.00071	-6.17	0.013	0.25	-1.68	0.013	0.088	-3.67	0.013	367167	S140123_029	gi|28195663	ribulose-1,5-bisphosphate carboxylase/oxygenase large subunit [Phoenix dactylifera]	49566	247	2	RBL_PHORE	Ribulose bisphosphate carboxylase large chain (Fragment) OS=Phoenix reclinata GN=rbcL PE=3 SV=1	51.7	265	6	K
3899	3.5e-05	-13.01	0.0089	0.18	-1.87	0.0089	0.11	-6.95	0.0089	1978849	S140123_030	gi|28195663	ribulose-1,5-bisphosphate carboxylase/oxygenase large subunit [Phoenix dactylifera]	49566	334	2	RBL_CALUS	Ribulose bisphosphate carboxylase large chain (Fragment) OS=Calamus usitatus GN=rbcL PE=3 SV=1	51.8	364	7	K
3899	3.5e-05	-13.01	0.0089	0.18	-1.87	0.0089	0.11	-6.95	0.0089	1978849	S140123_030		x				PSB2A_ARATH	Proteasome subunit beta type-2-A OS=Arabidopsis thaliana GN=PBD1 PE=1 SV=1	22.5	55	1	K
4041	0.11	2.45	0.19	0.92	1.12	0.19	0.18	2.2	0.19	134158	S140123_031	gi|1292972	ribulose-1,5-bisphosphate carboxylase/oxygenase large subunit, partial (chloroplast) [Centella erecta]	53346	214	2	RBL_CALUS	Ribulose bisphosphate carboxylase large chain (Fragment) OS=Calamus usitatus GN=rbcL PE=3 SV=1	51.8	236	6	K
4041	0.11	2.45	0.19	0.92	1.12	0.19	0.18	2.2	0.19	134158	S140123_031	gi|346683351	hypothetical chloroplast RF1 [Pyrus pyrifolia]	225116	49	1		x
4041	0.11	2.45	0.19	0.92	1.12	0.19	0.18	2.2	0.19	134158	S140123_031	gi|134684	Superoxide dismutase [Cu-Zn], chloroplastic; Flags: Precursor	22416	48	1	SODCP_VITVI	Superoxide dismutase [Cu-Zn], chloroplastic OS=Vitis vinifera GN=SODCP PE=2 SV=1	21.7	117	2	K
4085	0.003	-4.65	0.033	0.32	-1.41	0.033	0.13	-3.31	0.033	3959827	S140123_032	gi|3560792	ribulose-1,5-bisphosphate carboxylase/oxygenase [Pachyplectron arifolium]	48562	300	5	RBL_PHORE	Ribulose bisphosphate carboxylase large chain (Fragment) OS=Phoenix reclinata GN=rbcL PE=3 SV=1	51.7	370	8	k
4103	0.0017	-2.66	0.053	0.12	-1.68	0.053	0.59	-1.59	0.053	534640	S140123_033	gi|194400642	ribulose-1,5-bisphosphate carboxylase/oxygenase large subunit [Jasione laevis]	49293	194	3	RBL_PHORE	Ribulose bisphosphate carboxylase large chain (Fragment) OS=Phoenix reclinata GN=rbcL PE=3 SV=1	51.7	344	7	K
4429	0.11	-5.28	0.25	0.72	-1.35	0.25	0.18	-3.92	0.25	606402	S140123_042	gi|3152721	ribulose-1,5-bisphosphate carboxylase/oxygenase large subunit [Zantedeschia aethiopica]	53604	243	2	RBL_BARSC	Ribulose bisphosphate carboxylase large chain (Fragment) OS=Barnardia scilloides GN=rbcL PE=3 SV=1	50.4	347	8	K
4589	0.12	-3.11	0.34	0.67	-1.08	0.34	0.35	-2.88	0.34	590951	S140123_034	gi|499068515	ribulose-1,5-bisphosphate carboxylase large subunit, partial (chloroplast) [Moraea riparia]	49683	296	2	RBL_PHORE	Ribulose bisphosphate carboxylase large chain (Fragment) OS=Phoenix reclinata GN=rbcL PE=3 SV=1	51.7	362	7	K
4921	0.00056	-13.07	0.039	0.2	-1.88	0.039	0.28	-6.94	0.039	2685248	S140123_035	gi|1769935	ribulose-1,5-bisphosphate carboxylase/oxygenase large subunit [Burchellia bubalina]	52367	252	3	RBL_BARSC	Ribulose bisphosphate carboxylase large chain (Fragment) OS=Barnardia scilloides GN=rbcL PE=3 SV=1	50.4	487	9	K
4962	0.00044	-9.05	0.018	0.28	-1.21	0.018	0.11	-7.46	0.018	621956	S140123_036	gi|5725121	ribulose-1,5-bisphosphate carboxylase large subunit [Tupistra grandis]	52499	181	3	RBL_PHORE	Ribulose bisphosphate carboxylase large chain (Fragment) OS=Phoenix reclinata GN=rbcL PE=3 SV=1	51.7	209	4	K
4962	0.00044	-9.05	0.018	0.28	-1.21	0.018	0.11	-7.46	0.018	621956	S140123_036	gi|845230	maturase [Bensoniella oregona]	59927	50	1		x
4975	0.01	-5.33	0.038	0.23	-1.7	0.038	0.17	-3.14	0.038	957903	S140123_037	gi|28195663	ribulose-1,5-bisphosphate carboxylase/oxygenase large subunit [Phoenix dactylifera]	49566	433	4	RBL_DRYSU	Ribulose bisphosphate carboxylase large chain (Fragment) OS=Drymophloeus subdisticha GN=rbcL PE=3 SV=1	52.3	427	9	K
4975	0.01	-5.33	0.038	0.23	-1.7	0.038	0.17	-3.14	0.038	957903	S140123_037	gi|461595	ATP synthase subunit b', chloroplastic [Spinacia oleracea]	24444	48	1	ATPX_SPIOL	ATP synthase subunit b', chloroplastic OS=Spinacia oleracea	24.4	49	1	K
5006	0.0079	-6.04	0.1	0.31	-1.27	0.1	0.26	-4.75	0.1	352201	S140123_038	gi|55785631	ribulose 1,5-bisphosphate carboxylase/oxygenase large subunit [Grimmia orbicularis]	52968	78	1	RBL_AMOTI	Ribulose bisphosphate carboxylase large chain (Fragment) OS=Amorphophallus titanum GN=rbcL PE=3 SV=1	52.5	191	5	K
5035	0.011	-8.1	0.14	0.34	-1.13	0.14	0.41	-7.14	0.14	2742650	S140123_039	gi|16565309	ribulose 1,5-bisphosphate carboxylase large subunit [Wachendorfia thyrsiflora]	52529	364	4	RBL_BARSC	Ribulose bisphosphate carboxylase large chain (Fragment) OS=Barnardia scilloides GN=rbcL PE=3 SV=1	50.4	428	7	K
5035	0.011	-8.1	0.14	0.34	-1.13	0.14	0.41	-7.14	0.14	2742650	S140123_039	gi|15226197	leucine-rich repeat transmembrane protein kinase-like protein [Arabidopsis thaliana]	79284	48	1	PS4_PINST	Putative LRR disease resistance protein/transmembrane receptor kinase PS4 (Fragment) OS=Pinus strobus	870	48	1	K
5231	0.077	1.72	0.17	0.97	1.03	0.17	0.12	1.68	0.17	34033	S140123_040	gi|292559516	ribulose-1,5-bisphosphate carboxylase/oxygenase large subunit [Phoenix dactylifera]	54271	336	4	RBL_ASPEL	Ribulose bisphosphate carboxylase large chain (Fragment) OS=Aspidistra elatior GN=rbcL PE=3 SV=1	49.8	723	17	k
5231	0.077	1.72	0.17	0.97	1.03	0.17	0.12	1.68	0.17	34033	S140123_040	gi|116782330	unknown [Picea sitchensis]	16302	127	2	PSBA_NANDO	Photosystem Q(B) protein OS=Nandina domestica GN=psbA PE=3 SV=1	38.8	107	2	k
5231	0.077	1.72	0.17	0.97	1.03	0.17	0.12	1.68	0.17	34033	S140123_040	gi|2197012	D1 protein, photosystem II [Phoenix dactylifera]	33171	79	1	NDKB_FLABI	Nucleoside diphosphate kinase B OS=Flaveria bidentis + Pseudotsuga menziesii	16.2/62.9	95+63	1+1	k
5231	0.077	1.72	0.17	0.97	1.03	0.17	0.12	1.68	0.17	34033	S140123_040	gi|292559525	cytochrome b559 alpha chain [Phoenix dactylifera]	9380	62	1	PSBE_PHAAO	Cytochrome b559 subunit alpha OS=Phalaenopsis aphrodite subsp. formosana GN=psbE PE=3 SV=1	9.3	78	1	k
5231	0.077	1.72	0.17	0.97	1.03	0.17	0.12	1.68	0.17	34033	S140123_040	gi|158325128	ATP synthase alpha subunit [Phoenix dactylifera]	18618	55	1	PSBB_ACOAM	Photosystem II CP47/CP43 chlorophyll apoprotein OS=Acorus americanus	56.1	54+53	1+1	k
5231	0.077	1.72	0.17	0.97	1.03	0.17	0.12	1.68	0.17	34033	S140123_040	gi|167270	ribulose 1,5-bisphosphate carboxylase/oxygenase small subunit [Mesembryanthemum crystallinum]	20311	54	1	ATPA_BUXMI	ATP synthase subunit alpha, chloroplastic OS=Buxus microphylla	55.4	48	1	k
5300	0.16	-2.83	0.46	0.77	1.23	0.46	0.44	-3.47	0.46	287026	S140123_041	gi|292559516	ribulose-1,5-bisphosphate carboxylase/oxygenase large subunit [Phoenix dactylifera]	54271	353	4	RBL_DIOEL	Ribulose bisphosphate carboxylase large chain OS=Dioscorea elephantipes GN=rbcL PE=3 SV=1	52.9	304	6	K
													Proteins shown in grey are identified only due to 1 peptide found, it is too less for reliable protein identification.
