# Supplementary material for: Proteome Analysis for Understanding Abiotic Stress (Salinity and Drought) Tolerance in Date Palm (Phoenix dactylifera L.)
Source: Int J Genomics. 2015 Jun 18;2015:407165. doi: 10.1155/2015/407165 (PMC4488584; doi:10.1155/2015/407165)
Supplement: Supplementary file 1 — Supplementary materials shown in Table (1) is DIGE and MS analysis, Table (2) shows average ra-tio of robustly identified proteins, Table (3) shows robustly identified proteins (in salt stress, drought stress and salt and drought stress), Table (4) shows t-test for robustly identified proteins and Table (5) Average ratio of robustly identified proteins in drought and salt stressed plants. [file 407165.f1.zip › 407165.f1/Table 2 supplementary materials Robustly identified proteins.xls]

## Sheet: Sheet1
Robustly identified proteins
Master No.	Av. Ratio	Av. Ratio	Av. Ratio	NCBInr number	protein name (green plant search)	Mr	protein Score	number of peptides
2021	3.32	2.02	1.64	gi|158325128	ATP synthase alpha subunit [Phoenix dactylifera]	18618	99	1
1788	3.3	2.03	1.63	gi|292559515	ATP synthase CF1 beta chain [Phoenix dactylifera]	53847	1339	18
4041	2.45	1.12	2.2	gi|1292972	ribulose-1,5-bisphosphate carboxylase/oxygenase large subunit, partial (chloroplast) [Centella erecta]	53346	214	2
4041	2.45	1.12	2.2	SODCP_VITVI	Superoxide dismutase [Cu-Zn], chloroplastic OS=Vitis vinifera GN=SODCP PE=2 SV=1	21.7	117	2
1780	2.1	1.94	1.09	gi|292559515	ATP synthase CF1 beta chain [Phoenix dactylifera]	53847	292	5
5231	1.72	1.03	1.68	gi|292559516	ribulose-1,5-bisphosphate carboxylase/oxygenase large subunit [Phoenix dactylifera]	54271	336	4
5231	1.72	1.03	1.68	gi|116782330	unknown [Picea sitchensis]	16302	127	2
2796	-2.5	-4.12	1.65	gi|28195663	ribulose-1,5-bisphosphate carboxylase/oxygenase large subunit [Phoenix dactylifera]	49566	369	2
3061	-2.6	-1.82	-1.43	gi|102139745	chlorophyll A-B binding protein (CAB), putative [Musa acuminata]	28055	152	2
4103	-2.66	-1.68	-1.59	gi|194400642	ribulose-1,5-bisphosphate carboxylase/oxygenase large subunit [Jasione laevis]	49293	194	3
3765	-2.71	-1.73	-1.56	gi|224109746	light-harvesting complex I protein Lhca1 [Populus trichocarpa]	26532	136	2
5300	-2.83	1.23	-3.47	gi|292559516	ribulose-1,5-bisphosphate carboxylase/oxygenase large subunit [Phoenix dactylifera]	54271	353	4
2919	-2.96	-2.03	-1.46	gi|205830697	Unknown protein 18	1393	125	2
4589	-3.11	-1.08	-2.88	gi|499068515	ribulose-1,5-bisphosphate carboxylase large subunit, partial (chloroplast) [Moraea riparia]	49683	296	2
2935	-3.17	-1.57	-2.02	gi|28195663	ribulose-1,5-bisphosphate carboxylase/oxygenase large subunit [Phoenix dactylifera]	49566	199	2
1272	-3.48	-1.35	-2.58	gi|469474163	transketolase [Camellia sinensis]	81266	375	4
3008	-3.7	-2.57	-1.44	gi|209417491	ribulose-biphosphate carboxylase [Cyrtosperma macrotum]	51852	229	2
2594	-3.99	1.33	-5.31	gi|514810582	ribulose bisphosphate carboxylase/oxygenase activase, chloroplastic-like [Setaria italica]	52132	235	3
2967	-4.21	-1.63	-2.58	gi|3152721	ribulose-1,5-bisphosphate carboxylase/oxygenase large subunit [Zantedeschia aethiopica]	53604	322	3
2882	-4.27	-1.39	-3.07	gi|292559516	ribulose-1,5-bisphosphate carboxylase/oxygenase large subunit [Phoenix dactylifera]	54271	509	3
2439	-4.39	-1.62	-2.71	gi|255544584	phosphoglycerate kinase, putative [Ricinus communis]	50114	431	5
2439	-4.39	-1.62	-2.71	gi|225466690	sedoheptulose-1,7-bisphosphatase, chloroplastic [Vitis vinifera]	42898	118	2
3324	-4.57	-1.6	-2.86	gi|146403796	chloroplast light-harvesting chlorophyll a/b-binding protein [Artemisia annua]	28542	90	2
4085	-4.65	-1.41	-3.31	gi|3560792	ribulose-1,5-bisphosphate carboxylase/oxygenase [Pachyplectron arifolium]	48562	300	5
2528	-4.67	-1.27	-3.68	gi|195645472	phosphoribulokinase [Zea mays]	46078	176	2
1278	-5.15	-1.63	-3.16	gi|469474163	transketolase [Camellia sinensis]	81266	268	2
4429	-5.28	-1.35	-3.92	gi|3152721	ribulose-1,5-bisphosphate carboxylase/oxygenase large subunit [Zantedeschia aethiopica]	53604	243	2
4975	-5.33	-1.7	-3.14	gi|28195663	ribulose-1,5-bisphosphate carboxylase/oxygenase large subunit [Phoenix dactylifera]	49566	433	4
1919	-5.36	-1.13	-4.73	gi|28195663	ribulose-1,5-bisphosphate carboxylase/oxygenase large subunit [Phoenix dactylifera]	49566	396	6
1839	-5.69	-1.22	-4.66	gi|28195663	ribulose-1,5-bisphosphate carboxylase/oxygenase large subunit [Phoenix dactylifera]	49566	244	3
5006	-6.04	-1.27	-4.75	RBL_AMOTI	Ribulose bisphosphate carboxylase large chain (Fragment) OS=Amorphophallus titanum GN=rbcL PE=3 SV=1	52.5	191	5
3883	-6.17	-1.68	-3.67	gi|28195663	ribulose-1,5-bisphosphate carboxylase/oxygenase large subunit [Phoenix dactylifera]	49566	247	2
3019	-6.38	-1.78	-3.58	gi|209417489	ribulose-biphosphate carboxylase [Lasia spinosa]	51811	390	5
2831	-6.48	-1.92	-3.37	gi|28195663	ribulose-1,5-bisphosphate carboxylase/oxygenase large subunit [Phoenix dactylifera]	49566	618	4
2806	-6.57	-1.72	-3.81	gi|28195663	ribulose-1,5-bisphosphate carboxylase/oxygenase large subunit [Phoenix dactylifera]	49566	214	2
1935	-7.32	-1.53	-4.79	gi|131974	ribulose-1,5-bisphosphate carboxylase/oxygenase large subunit [Harpagophytum grandidieri]	52139	153	2
3015	-7.6	-1.79	-4.25	gi|209417489	ribulose-biphosphate carboxylase [Lasia spinosa]	51811	463	5
5035	-8.1	-1.13	-7.14	gi|16565309	ribulose 1,5-bisphosphate carboxylase large subunit [Wachendorfia thyrsiflora]	52529	364	4
4962	-9.05	-1.21	-7.46	gi|5725121	ribulose-1,5-bisphosphate carboxylase large subunit [Tupistra grandis]	52499	181	3
2836	-9.99	-1.74	-5.75	gi|28195663	ribulose-1,5-bisphosphate carboxylase/oxygenase large subunit [Phoenix dactylifera]	49566	628	6
3899	-13.01	-1.87	-6.95	gi|28195663	ribulose-1,5-bisphosphate carboxylase/oxygenase large subunit [Phoenix dactylifera]	49566	334	2
4921	-13.07	-1.88	-6.94	gi|1769935	ribulose-1,5-bisphosphate carboxylase/oxygenase large subunit [Burchellia bubalina]	52367	252	3
