# Supplementary material for: Proteome Analysis for Understanding Abiotic Stress (Salinity and Drought) Tolerance in Date Palm (Phoenix dactylifera L.)
Source: Int J Genomics. 2015 Jun 18;2015:407165. doi: 10.1155/2015/407165 (PMC4488584; doi:10.1155/2015/407165)
Supplement: Supplementary file 1 — Supplementary materials shown in Table (1) is DIGE and MS analysis, Table (2) shows average ra-tio of robustly identified proteins, Table (3) shows robustly identified proteins (in salt stress, drought stress and salt and drought stress), Table (4) shows t-test for robustly identified proteins and Table (5) Average ratio of robustly identified proteins in drought and salt stressed plants. [file 407165.f1.zip › 407165.f1/Table 3 supplementary materials DSvSS robustly identified proteins.xls]

## Sheet: Sheet1
Robustly identified proteins
Master No.	Av. Ratio SS/DS	Av. Ratio SS	Av. Ratio DS	protein name (green plant search)	Mr	protein Score	number of peptides
4041	2.2	2.45	1.12	ribulose-1,5-bisphosphate carboxylase/oxygenase large subunit, partial (chloroplast) [Centella erecta]	53346	214	2
4041	2.2	2.45	1.12	Superoxide dismutase [Cu-Zn], chloroplastic OS=Vitis vinifera GN=SODCP PE=2 SV=1	21.7	117	2
1272	-2.58	-3.48	-1.35	transketolase [Camellia sinensis]	81266	375	4
2439	-2.71	-4.39	-1.62	phosphoglycerate kinase, putative [Ricinus communis]	50114	431	5
3324	-2.86	-4.57	-1.6	chloroplast light-harvesting chlorophyll a/b-binding protein [Artemisia annua]	28542	90	2
1278	-3.16	-5.15	-1.63	transketolase [Camellia sinensis]	81266	268	2
2528	-3.68	-4.67	-1.27	phosphoribulokinase [Zea mays]	46078	176	2
1935	-4.79	-7.32	-1.53	ribulose-1,5-bisphosphate carboxylase/oxygenase large subunit [Harpagophytum grandidieri]	52139	153	2
2594	-5.31	-3.99	1.33	ribulose bisphosphate carboxylase/oxygenase activase, chloroplastic-like [Setaria italica]	52132	235	3
2836	-5.75	-9.99	-1.74	ribulose-1,5-bisphosphate carboxylase/oxygenase large subunit [Phoenix dactylifera]	49566	628	6
4921	-6.94	-13.07	-1.88	ribulose-1,5-bisphosphate carboxylase/oxygenase large subunit [Burchellia bubalina]	52367	252	3
3899	-6.95	-13.01	-1.87	ribulose-1,5-bisphosphate carboxylase/oxygenase large subunit [Phoenix dactylifera]	49566	334	2
5035	-7.14	-8.1	-1.13	ribulose 1,5-bisphosphate carboxylase large subunit [Wachendorfia thyrsiflora]	52529	364	4
4962	-7.46	-9.05	-1.21	ribulose-1,5-bisphosphate carboxylase large subunit [Tupistra grandis]	52499	181	3
