# Supplementary material for: Proteome Analysis for Understanding Abiotic Stress (Salinity and Drought) Tolerance in Date Palm (Phoenix dactylifera L.)
Source: Int J Genomics. 2015 Jun 18;2015:407165. doi: 10.1155/2015/407165 (PMC4488584; doi:10.1155/2015/407165)
Supplement: Supplementary file 1 — Supplementary materials shown in Table (1) is DIGE and MS analysis, Table (2) shows average ra-tio of robustly identified proteins, Table (3) shows robustly identified proteins (in salt stress, drought stress and salt and drought stress), Table (4) shows t-test for robustly identified proteins and Table (5) Average ratio of robustly identified proteins in drought and salt stressed plants. [file 407165.f1.zip › 407165.f1/Table 4 Supplementary materials summary table ss.xls]

## Sheet: Sheet1
Robustly identified proteins
Master No.	T-test	Av. Ratio SS	Av. Ratio DS	Av. Ratio SS/DS	NCBInr/SwissProt number	protein name (green plant search)	Mr	protein Score	number of peptides
2021	0.03	3.32	2.02	1.64	gi|158325128	ATP synthase alpha subunit [Phoenix dactylifera]	18618	99	1
1788	0.0023	3.3	2.03	1.63	gi|292559515	ATP synthase CF1 beta chain [Phoenix dactylifera]	53847	1339	18
4041	0.11	2.45	1.12	2.2	SODCP_VITVI	Superoxide dismutase [Cu-Zn], chloroplastic OS=Vitis vinifera GN=SODCP PE=2 SV=1	21.7	117	2
5231	0.077	1.72	1.03	1.68	gi|116782330	unknown [Picea sitchensis]	16302	127	2
3061	0.018	-2.6	-1.82	-1.43	gi|102139745	chlorophyll A-B binding protein (CAB), putative [Musa acuminata]	28055	152	2
3765	0.0023	-2.71	-1.73	-1.56	gi|224109746	light-harvesting complex I protein Lhca1 [Populus trichocarpa]	26532	136	2
2919	0.025	-2.96	-2.03	-1.46	gi|205830697	Unknown protein 18	1393	125	2
2594	0.012	-3.99	1.33	-5.31	gi|514810582	ribulose bisphosphate carboxylase/oxygenase activase, chloroplastic-like [Setaria italica]	52132	235	3
2439	0.00095	-4.39	-1.62	-2.71	gi|255544584	phosphoglycerate kinase, putative [Ricinus communis]	50114	431	5
3324	0.0019	-4.57	-1.6	-2.86	gi|146403796	chloroplast light-harvesting chlorophyll a/b-binding protein [Artemisia annua]	28542	90	2
2528	0.0031	-4.67	-1.27	-3.68	gi|195645472	phosphoribulokinase [Zea mays]	46078	176	2
1278	0.1	-5.15	-1.63	-3.16	gi|469474163	transketolase [Camellia sinensis]	81266	268	2
1935	0.1	-7.32	-1.53	-4.79	gi|131974	ribulose-1,5-bisphosphate carboxylase/oxygenase large subunit [Harpagophytum grandidieri]	52139	153	2
2836		-9.99	-1.74	-5.75	gi|28195663	ribulose-1,5-bisphosphate carboxylase/oxygenase large subunit [Phoenix dactylifera]	49566	628	6
4921	0.00056	-13.07	-1.88	-6.94	gi|1769935	ribulose-1,5-bisphosphate carboxylase/oxygenase large subunit [Burchellia bubalina]	52367	252	3
