# Supplementary material for: Proteome Analysis for Understanding Abiotic Stress (Salinity and Drought) Tolerance in Date Palm (Phoenix dactylifera L.)
Source: Int J Genomics. 2015 Jun 18;2015:407165. doi: 10.1155/2015/407165 (PMC4488584; doi:10.1155/2015/407165)
Supplement: Supplementary file 1 — Supplementary materials shown in Table (1) is DIGE and MS analysis, Table (2) shows average ra-tio of robustly identified proteins, Table (3) shows robustly identified proteins (in salt stress, drought stress and salt and drought stress), Table (4) shows t-test for robustly identified proteins and Table (5) Average ratio of robustly identified proteins in drought and salt stressed plants. [file 407165.f1.zip › 407165.f1/Table 5 supplementary materials summary table ds.xls]

## Sheet: Sheet1
Robustly identified proteins
Master No.	Av. Ratio DS	Av. Ratio SS	protein name (green plant search)	Mr	protein Score	number of peptides
1788	2.03	3.3	ATP synthase CF1 beta chain [Phoenix dactylifera]	53847	1339	18
2021	2.02	3.32	ATP synthase alpha subunit [Phoenix dactylifera]	18618	99	1
1780	1.94	2.1	ATP synthase CF1 beta chain [Phoenix dactylifera]	53847	292	5
2919	-2.03	-2.96	Unknown protein 18	1393	125	2
3008	-2.57	-3.7	ribulose-biphosphate carboxylase [Cyrtosperma macrotum]	51852	229	2
2796	-4.12	-2.5	ribulose-1,5-bisphosphate carboxylase/oxygenase large subunit [Phoenix dactylifera]	49566	369	2
